# Supplementary material for: Testing the Mystic School Mobile Application to Promote Active Commuting to School in Spanish Adolescents: The PACO Study
Source: MDPI journal article supplement (doi:10.3390/children9121997), 2022-12-19
Supplement: s1 [file s1]

**Supplementary Materials S1: Questions about different aspects.** The following supporting information can be downloaded at: <https://www.mdpi.com/article/10.3390/children9121991/s1>, questions about the application.

| Number | Questions                                                                                                                                                                 |
|--------|---------------------------------------------------------------------------------------------------------------------------------------------------------------------------|
| 1      | Did you find it easy to pass the level?                                                                                                                                   |
| 2      | Were the objectives set at each level difficult to achieve or too easy? Were they clear?                                                                                  |
| 3      | If you imagine for a moment that the app is yours and you had the power to change, improve or remove something, what would you do?                                        |
| 4      | Would you like the App to have additional functions? Which ones?                                                                                                          |
| 5      | What difficulties have you encountered when playing on the App?                                                                                                           |
| 6      | At some point in the game you didn't know what to do or felt lost?                                                                                                        |
| 7      | What did you like least about the app, and what did you like most?                                                                                                        |
| 8      | Would you like the App to allow you to customise the design and appearance of your avatar? In other words, what should it have?                                           |
| 9      | What did you think of the idea of moving around the game through a maze, would you change anything, and can you think of another idea that would be more fun and dynamic? |
| 10     | When you click on the avatar, what information do you think would be relevant to add in that section in addition to the steps?                                            |
| 11     | Is the idea of playing in groups of maximum 3 people useful? Is the app focused on role-playing interesting or would there be another way to make it more fun?            |
| 12     | Would you be interested in the App having the function of sharing your achievements and data on the network, would it be useful, in which ones?                           |
| 13     | Would you like to be able to talk to your group mates in-game via chat? Do you have another idea?                                                                         |
| 14     | How did you feel when you were playing? What feelings did you have?                                                                                                       |
| 15     | What do you think of the App and would you play again?                                                                                                                    |
| 16     | Would you recommend it to a friend?                                                                                                                                       |
| 17     | Have you noticed any different behaviour than usual while playing the App? What is it?                                                                                    |
| 18     | Do you think this change is positive, negative or indifferent to your life and why?                                                                                       |
| 19     | Have you ever got tired of walking to get around or to pass different levels?                                                                                             |

- 
- 20      What do you think of the design, we want to know if you feel identified with this model-profile or what things you would change or add to the avatar. If the appearance of the game adapts to the age that is intended (14-15 years old).
